# Supplementary material
Source: publisher site journal article supplement (https://www.dovepress.com/article/602054)
Supplement: Supplementary file 1 [file 602054%20Revised%20Supplementary%20Material.docx]

Supplementary Table 1 The list of immunohistochemistry markers.

| Antibody name | Clone/type | Dilution rate | Manufacturer |
| --- | --- | --- | --- |
| CD99 | Mouse monoclonal antibody | 1:100 | Dako |
| CD56 | Mouse monoclonal antibody | 1:100 | Dako |
| NKX2.2 | Mouse monoclonal antibody | 1:100 | Dako |
| WT1 | Mouse monoclonal antibody | 1:100 | Dako |
| P16 | Mouse monoclonal antibody | 1:100 | Dako |
| P53 | Mouse monoclonal antibody | 1:100 | Dako |
| β-caternin | Mouse monoclonal antibody | 1:100 | Dako |
| Desmin | Mouse monoclonal antibody | 1:100 | Dako |
| Ki67 | Mouse monoclonal antibody | 1:100 | Dako |
| PAX8 | Mouse monoclonal antibody | 1:100 | Dako |
| SALL4 | Mouse monoclonal antibody | 1:100 | Dako |
| ER | Mouse monoclonal antibody | 1:100 | Dako |
| PR | Mouse monoclonal antibody | 1:100 | Dako |
| MyoD1 | Mouse monoclonal antibody | 1:100 | Dako |
| CD10 | Mouse monoclonal antibody | 1:100 | Dako |
| CgA | Mouse monoclonal antibody | 1:100 | Dako |
| CK5 | Mouse monoclonal antibody | 1:100 | Dako |
| CK7 | Mouse monoclonal antibody | 1:100 | Dako |
| CK20 | Mouse monoclonal antibody | 1:100 | Dako |
| CKpan | Mouse monoclonal antibody | 1:100 | Dako |
| S-100 | Mouse monoclonal antibody | 1:100 | Dako |
| Syn | Mouse monoclonal antibody | 1:100 | Dako |


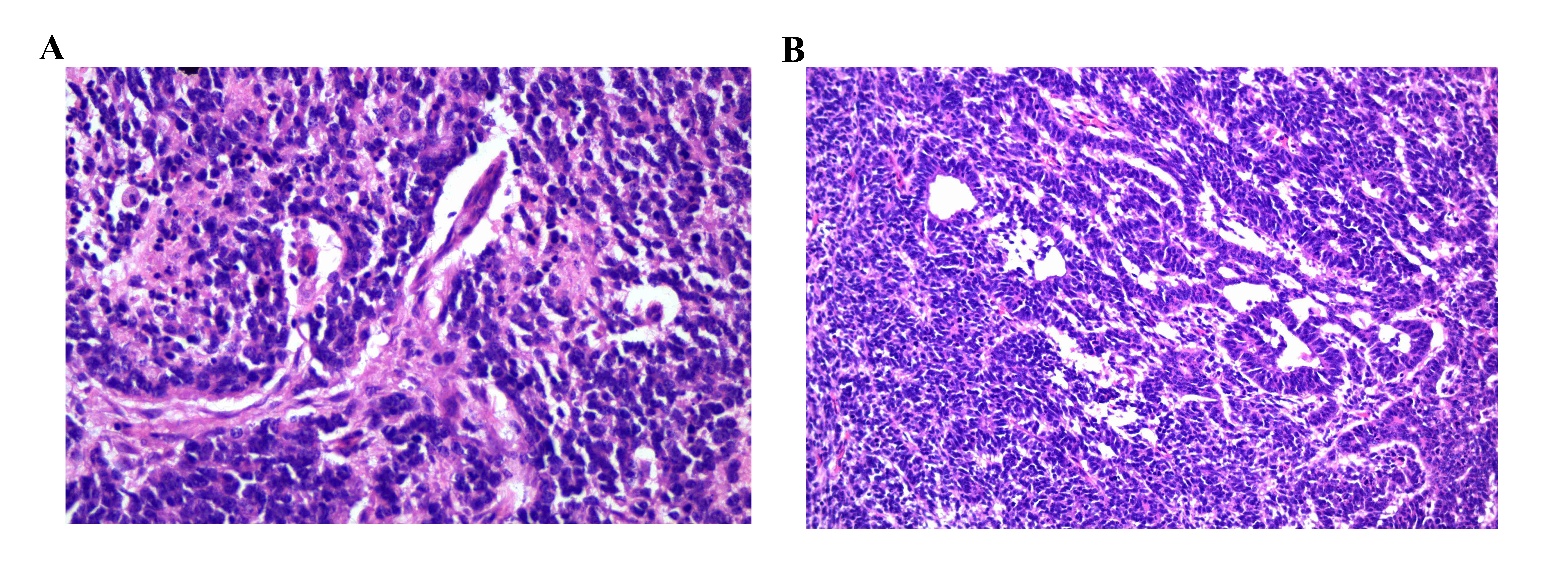
**Supplementary Figure 1** The Hematoxylin and Eosin staining results from different regions of the tumor (×400), including region 1 (A) and region 2 (B).


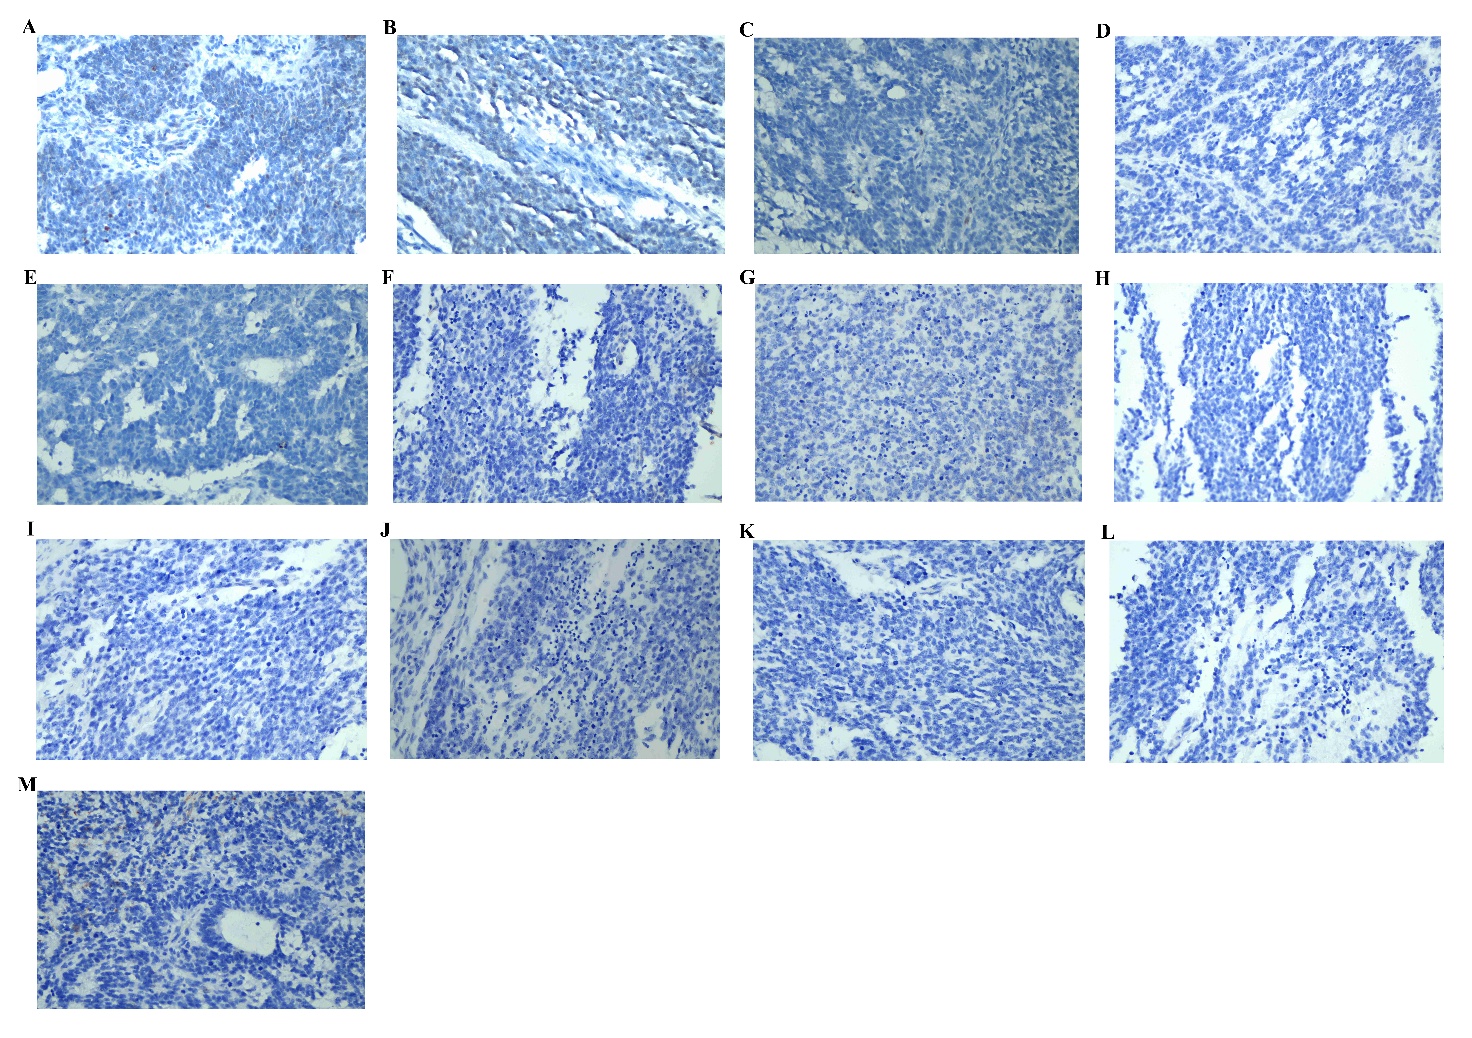
**Supplementary Figure 2** Negative immunohistochemistry results (×400), including PAX8 (A), SALL4 (B), ER(C), PR (D), MyoD1 (E), CD10 (F), CgA (G), CK5 (H), CK7 (I), CK20 (J), CKpan (K), S-100 (L), and Syn (M).
